# Supplementary material for: SpatialDM for rapid identification of spatially co-expressed ligand–receptor and revealing cell–cell communication patterns
Source: PubMed Central journal article supplement (PMC10325966; doi:10.1038/s41467-023-39608-w), 2023-07-06
Supplement: 41467_2023_39608_MOESM12_ESM.pdf [file 41467_2023_39608_MOESM12_ESM.pdf]

## **Description of Additional Supplementary Files:**

**Supplementary Dataset 1:** Output from SpatialDM, SpatialCorr, Giotto, CellChat (Trimean & Truncated-mean) and SpaTalk (in separated sheets) in the melanoma dataset.

**Supplementary Dataset 2:** Output from SpatialDM, SpatialCorr, Giotto, CellChat (Trimean & Truncated-mean) and SpaTalk in the melanoma dataset with 663 unique shuffled pairs to reflect false positive selections.

**Supplementary Dataset 3:** Full lists of interactions belonging to the 3 clusters in the melanoma dataset (Fig 2b)

**Supplementary Dataset 4:** GO analysis result for FCER-upregulated spots in the melanoma dataset (Supplementary Figure 3e)

**Supplementary Dataset 5:** SpatialDM identified results (FDR<0.05) for pairs discussed by Corbett, et al.

**Supplementary Dataset 6:** SpatialDM results for the 8 samples from the intestine dataset.

**Supplementary Dataset 7:** Full lists of interactions belonging to the 4 clusters in the intestine dataset (Fig 3d & Supplementary Figure 7a)

**Supplementary Dataset 8:** Differential analysis for the interactions in the intestine dataset with differential p-values computed by the likelihood-ratio test of global zscores.
